# Supplementary material for: Variant-specific pathophysiological mechanisms of AFF3 differently influence transcriptome profiles
Source: PubMed Central journal article supplement — medRxiv. 2024 Jan 17:2024.01.14.24301100. Preprint. [Version 1] doi: 10.1101/2024.01.14.24301100 (PMC10827271; doi:10.1101/2024.01.14.24301100), 2024-01-17

Figure S1

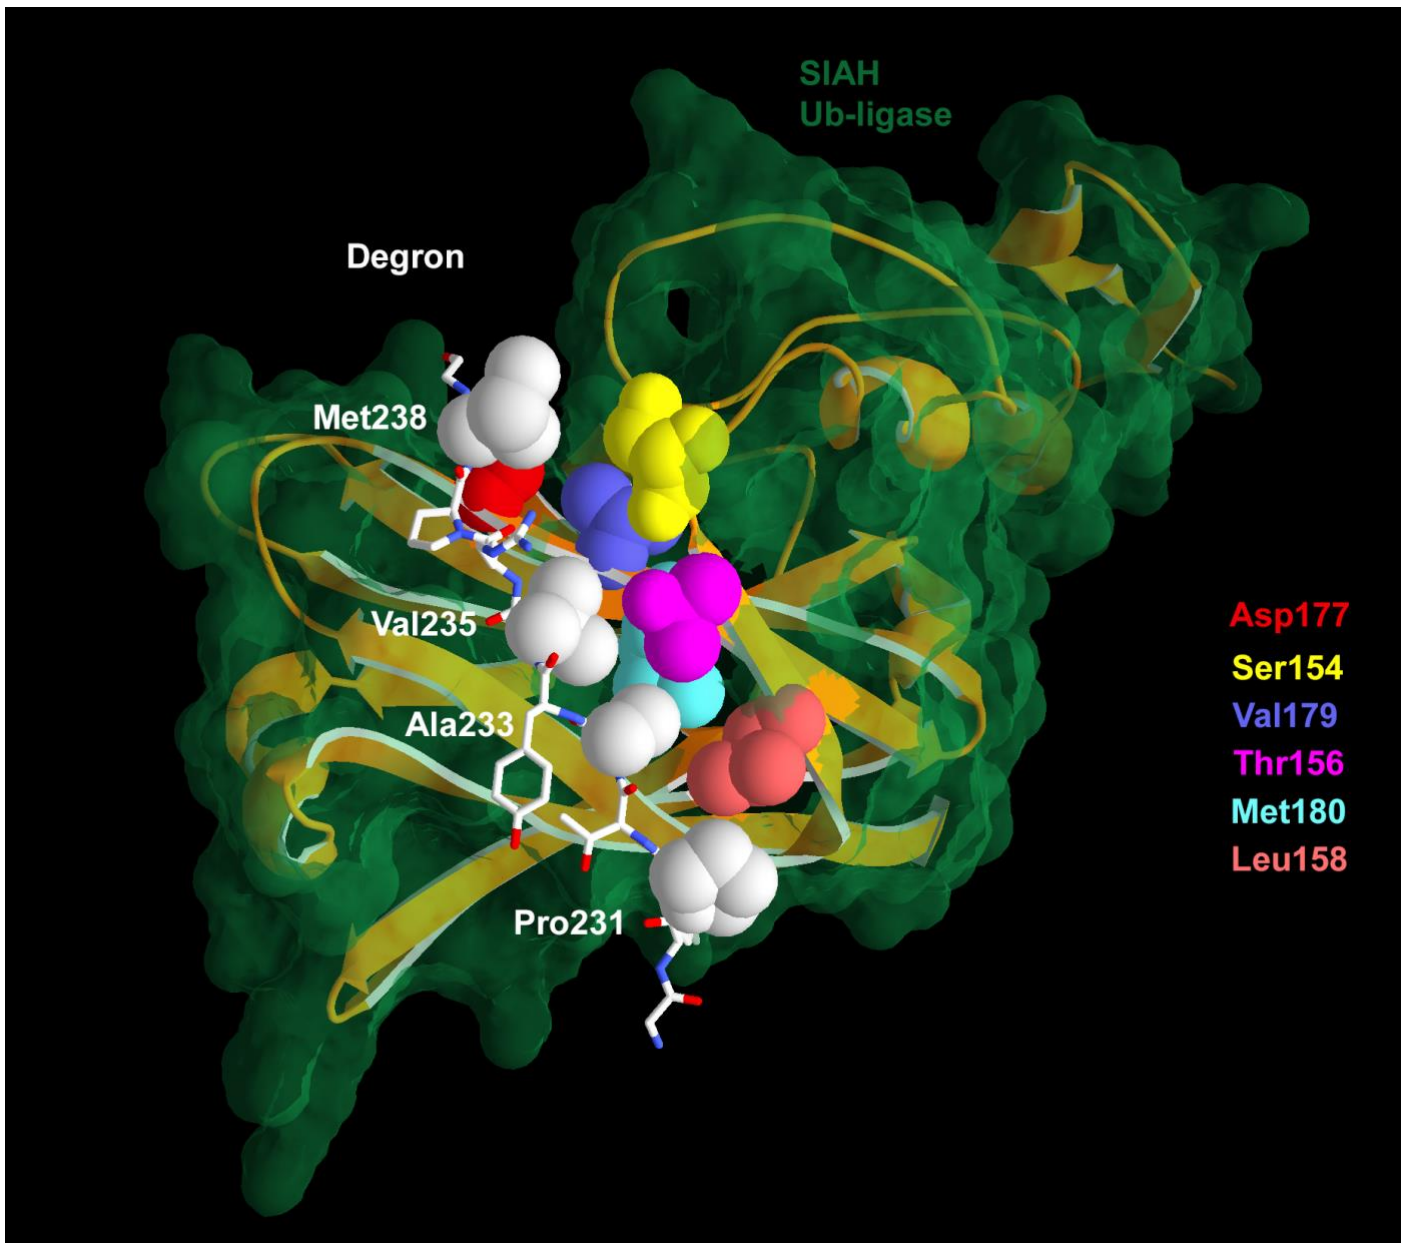

## Figure S2

medRxiv preprint doi: <https://doi.org/10.1101/2024.01.14.24301100>; this version posted January 17, 2024. The copyright holder for this preprint (which was not certified by peer review) is the author/funder, who has granted medRxiv a license to display the preprint in perpetuity.

A

CC-BY-NC-ND 4.0 International license

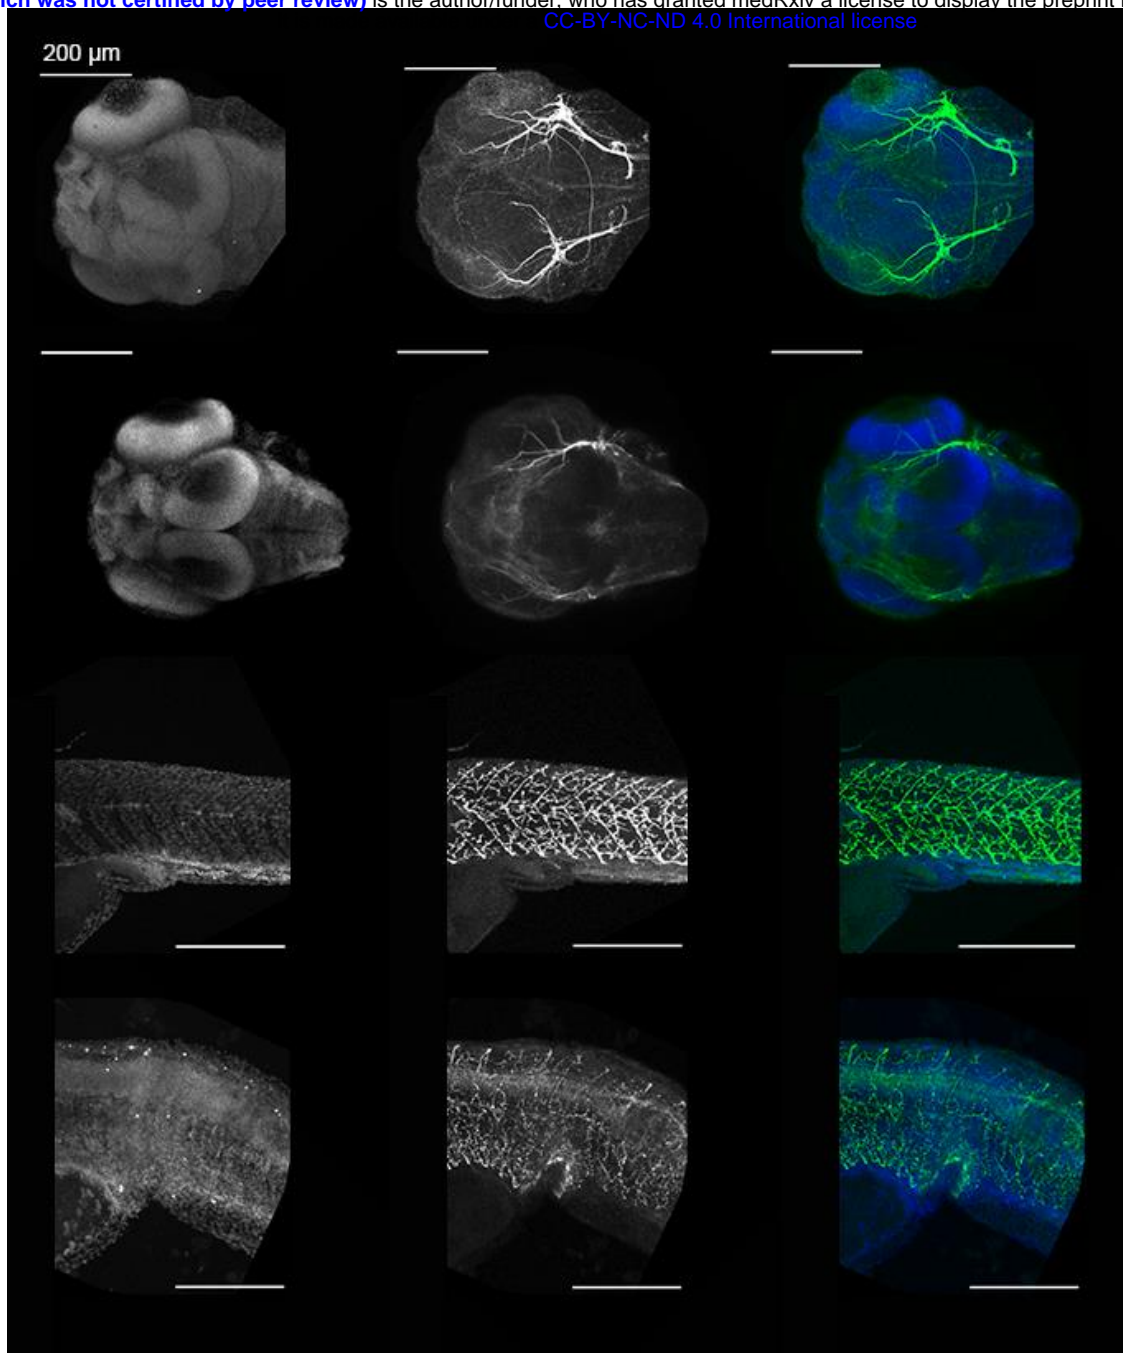

## Figure S3

# AFF3

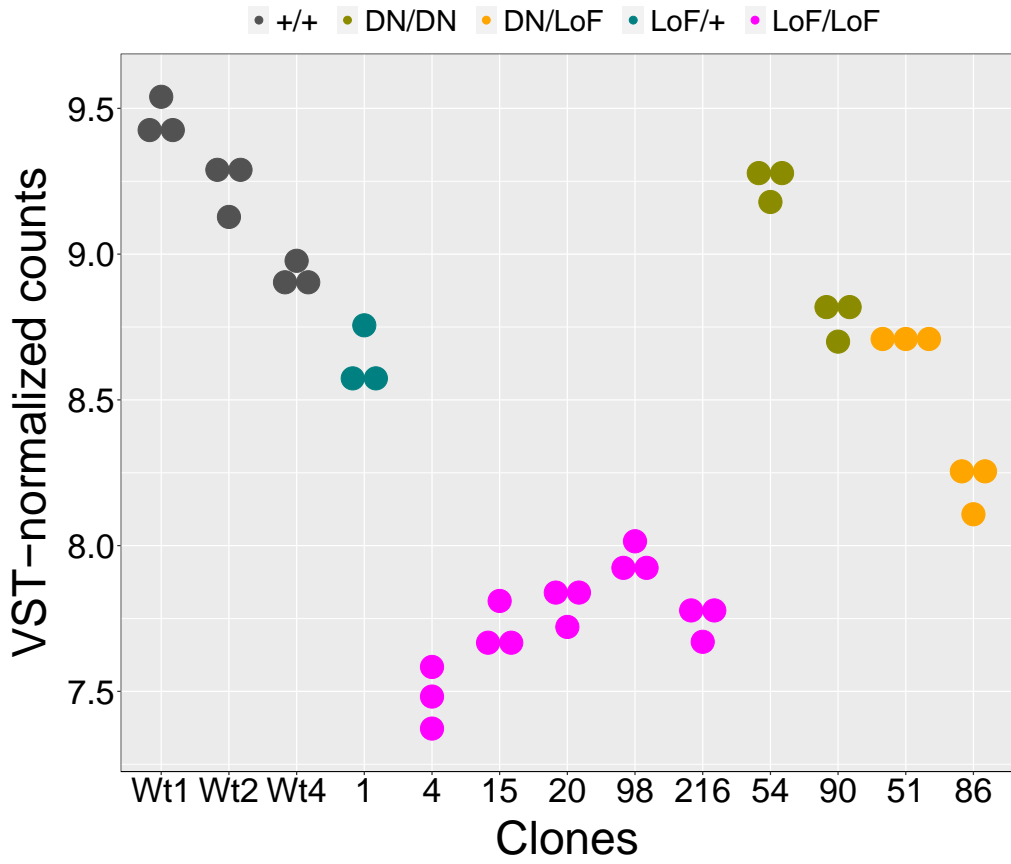

# Figure S4

A medRxiv preprint doi: <https://doi.org/10.1101/2024.01.14.24301100>; this version posted January 17, 2024. The copyright holder for this preprint (which was not certified by peer review) is the author/funder, who has granted medRxiv a license to display the preprint in perpetuity. It is made available under a [CC-BY-NC-ND 4.0 International license](https://creativecommons.org/licenses/by-nc-nd/4.0/).

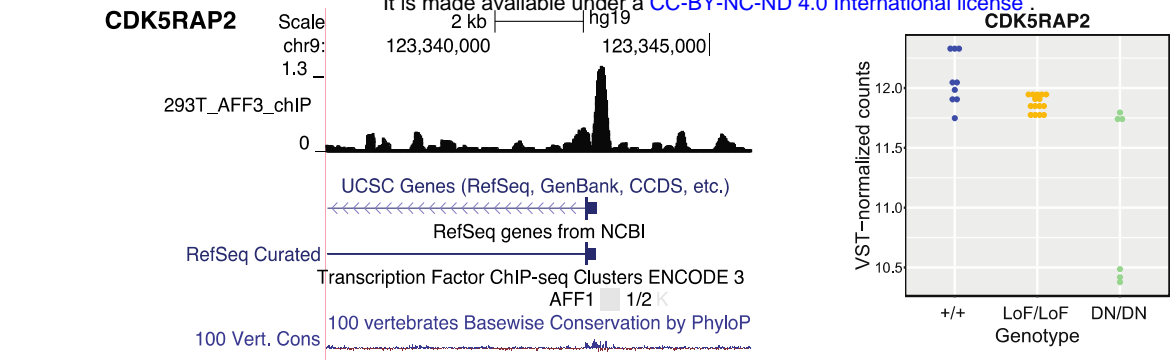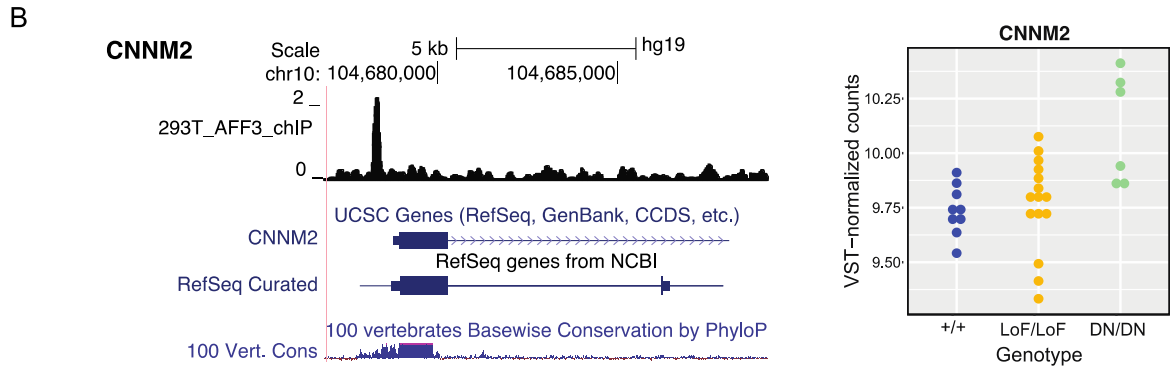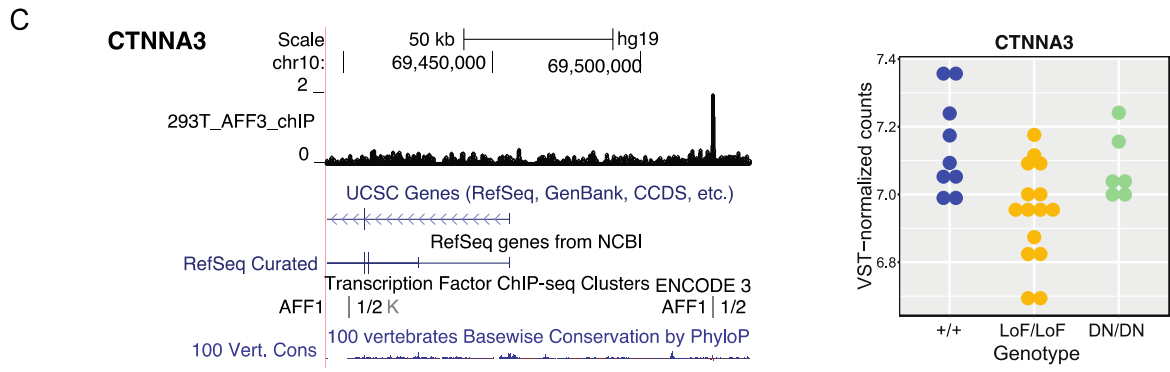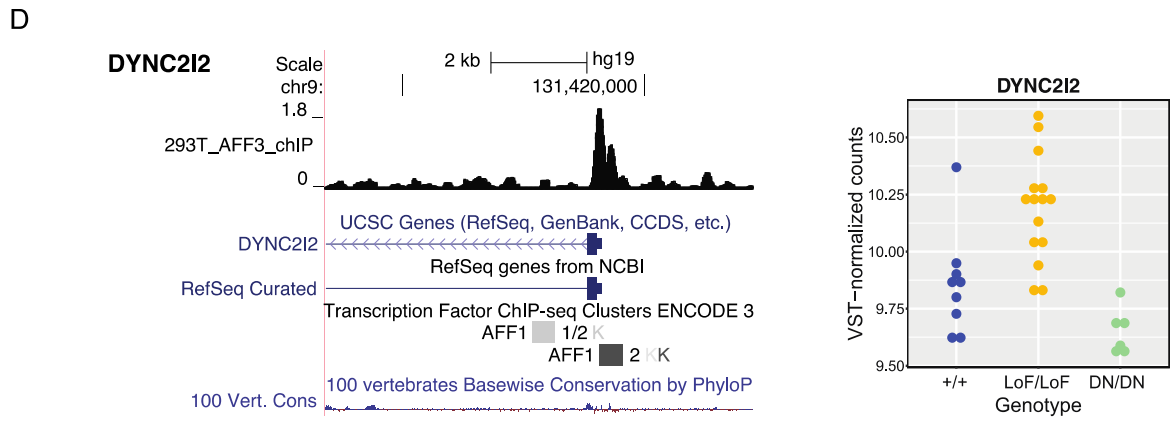

# Figure S5

medRxiv preprint doi: <https://doi.org/10.1101/2024.01.14.24301100>; this version posted January 17, 2024. The copyright holder for this preprint (which was not certified by peer review) is the author/funder, who has granted medRxiv a license to display the preprint in perpetuity. It is made available under a [CC-BY-NC-ND 4.0 International license](https://creativecommons.org/licenses/by-nc-nd/4.0/).

A

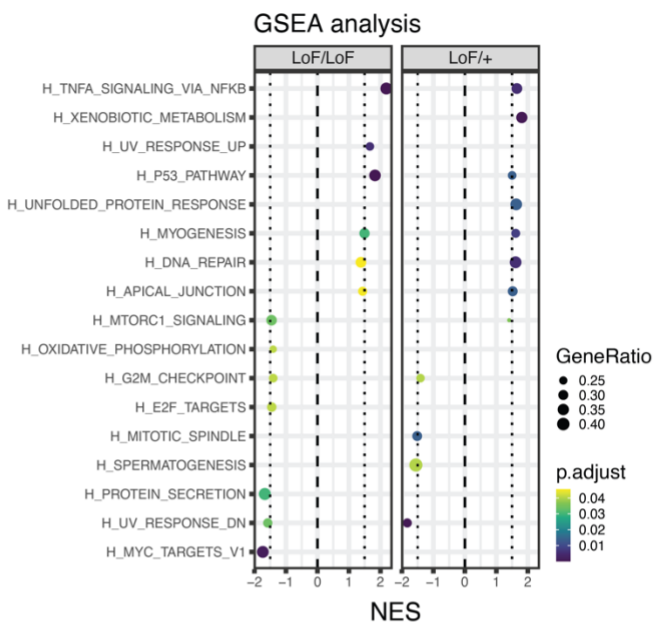

B

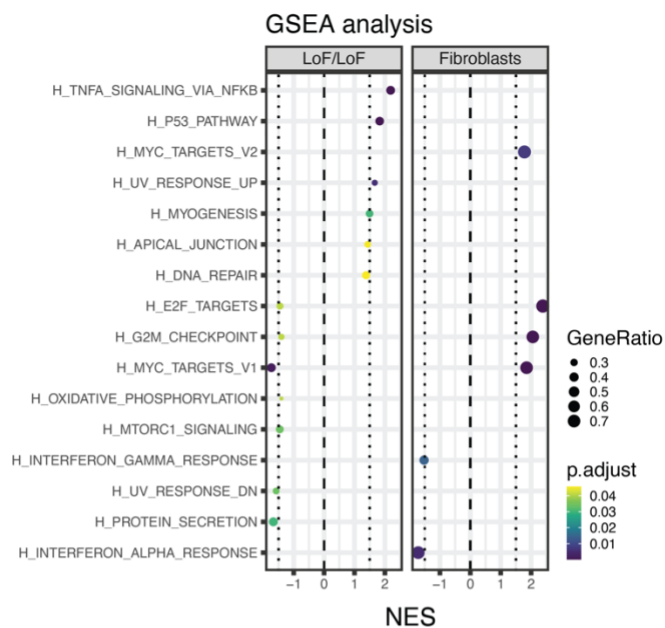

C

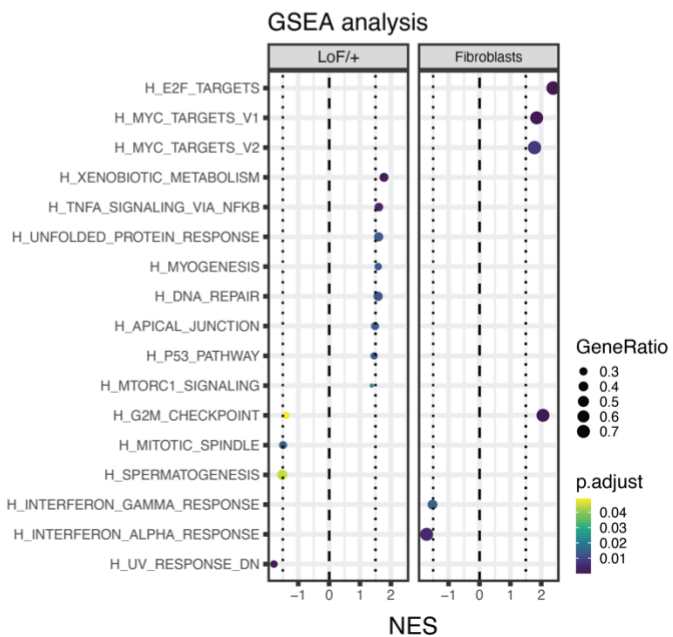

Supplement: NIHPP2024.01.14.24301100V1-supplement-1.pdf [file NIHPP2024.01.14.24301100V1-supplement-1.pdf]
